# Supplementary material for: High Throughput Screening of Antimicrobial Resistance Genes in Gram-Negative Seafood Bacteria
Source: MDPI journal article supplement (doi:10.3390/microorganisms10061225), 2022-06-15
Supplement: s1 [file s1]

**Table S1.** Primers and probes targeting antimicrobial resistance genes (ARGs) and mobile genetic elements (MGEs).

| Target          | Primers and probes sequences                                                           | Reference  |
|-----------------|----------------------------------------------------------------------------------------|------------|
| aac(6')-Ib      | F-AACTTGCGAGCGATCCGA<br>R-TGGCGTGTTTGAACCATGTAC<br>P-TACCTTGCTTCTCAAACCCCGCTTTCTC      | [22]       |
| aac(6')-Ib-cr   | F-AACTTGCGAGCGATCCGA<br>R-TGGCGTGTTTGAACCATGTAC<br>P-MGB-TACGGTACCTTGCTCT              | [22]       |
| aac(3)-IIa      | F-AGGACATCGTGACGTTCCG<br>R-AACCTGAAGGCTCGCAAGAG<br>P-CGGAGTGGTTCGAAATGCTTCTCAAG        | [22]       |
| aac(3)-IV       | F-ATCGGTCAGCTTCTCAACCT<br>R-TCGTCCAGACCTGACCAC<br>P-TCCACAGCTCCTTCCGTAGCGTCC           | [22]       |
| armA            | F-GAAAGAGTCGCAACATTAAATGACTT<br>R-GATTGAAGCCACAACCAAAATCT<br>P-TCAAACATGTCTCATCTATT    | [23]       |
| ant(2'')-Ia     | F-CGGCGAGCTCGAGGC<br>R-ATTCATACGCTTCGTCTGCC<br>P-TCATGGAGGAGTTGGACTATGGATTCTTAGCG      | [22]       |
| ant(3'')-Ia     | F-ACGTTGTCCCGCATTTGG<br>R-TCCTTCGGCGCGATTTT<br>P-MGB-ACAGCGCAGTAACC                    | [22]       |
| aph(3')-Ia      | F-ACCGAGGCAGTTCATAGGA<br>R-ACCTTATTTTTGACGAGGGGAAA<br>P-ATCCTGGTATCGGTCTGCGATTCCGA     | [22]       |
| strA            | F-TCAATCCCGACTTCTTACCGG<br>R-CACCATGGCAAACAACCATATC<br>P-MGB-TGGCTCGTGTCGAAC           | [22]       |
| strB            | F-ATCGCTTTCGAGCTTTGTTTC<br>R-TCCGAGGCATTGCTCATCATT<br>P-CGTCCACGCGGCGATTATAGCC         | [22]       |
| blaTEM          | F-GGTATTATCCCGTRTTGACGC<br>R-GTCCCTCCGATCGTTGTCAGAA<br>P-ACWCACCAGTCACAGAAAAGCATCTTMCG | This study |
| blaCTX-M-1group | F-AATCTGACGCTGGGTAAAGCR<br>R-CGTTGGTGGTRCCATAGYCAC<br>P-AGTCCWGCCTGAATRCTCGCTGCA       | This study |
| blaCTX-M-2group | F-CGACGCTACCCCTGCTATT<br>R-CATCACCTTACTGGTACTGCA<br>P-AACGCCAAGCCGACCTCCCGAACTT        | This study |
| blaCTX-M-8group | F-TAAGCGGATGATGCTAATGACAA<br>R-AACGTCGTTGCGCTGCGCA<br>P-CACTCCCCAGCAACAGCGAAATACAG     | This study |
| blaCTX-M-9group | F-CGTGGCTCAAAGGCAATACGA<br>R-ATAGGTCACCAGAACCAGCG<br>P-ACCGCAATATCATTTGGTGGTGCCGTAG    | This study |
| blaKPC2/3       | F-AGCGGCAGCAGTTTGTTGAT<br>R-ACGGCCAACACAATAGGT                                         | [22]       |

|           |                                                                                          |            |
|-----------|------------------------------------------------------------------------------------------|------------|
| blaNDM1/2 | P-CAGTCGGAGACAAAACCGGAACCTGC<br>F-CGCAACACAGCCTGACTTT<br>R-CAGCCACCAAAAAGCGATGTC         | [22]       |
| blaPER1   | P-CCAGCAACCGCGCCCAACTTTGG<br>F-GGCTAAGGTTTTACAGAATACCT<br>R-GTCCACCAACCAGTTCAAATAAC      | This study |
| blaVIM    | P-CGTATCAGGGAGACSAGTTTAGTGTTC<br>F1-GAGATTCCCACGCACTCTCTAGA<br>F2-GAGATTCCCACGATTCTCTAGA | [24]       |
| blaSHV    | R-AATGCGCAGCACCAGGATAG<br>P-ACGCAGTGCCTTCGGTCCAGT<br>F-TGACRAACAGCTGGAGCGAA              | This study |
| blaCMY-1  | R-GCTGTTATCGCTCAYGGTAATG<br>P-TCCACTATMGCCAGCAGSATCTGG<br>F-TGCTCAAGGATGGCAAGGC          | This study |
| blaCMY-2  | R-TCCCTTGACCACCGCATAG<br>P-AGGGTCGCAGTCAGGGTCTTGCTCA<br>F-AACCCTCAGGAATGAGTTACG          | This study |
| blaCMY-3  | R-CAAGTTGTCCCGGAGAAACG<br>P-CAATGACCAGACGCGTCCTGCAACC<br>F-GCTAACTCCAGYATTGGTCTG         | This study |
| floR      | R-CCAGGTATGCGCCAGTTTTAA<br>P-GACGCGTYTGGTCAATGCCTCTTC<br>F-AGATCGGATTCAGCTTTGCC          | [22]       |
| qnrA      | R-CAAAGGACTTCGCGAAACG<br>P-CGCCACTGTCGCGCTTGTAATGATC<br>F-AGGATTGCAGTTTCATTGAAAGC        | [25]       |
| qnrB1     | R-TGAACTCTATGCCAAAGCAGTTG<br>P-TATGCCGATCTGCGCGA<br>F-GTAGCGCATATATCACGAATACCAATC        | [22]       |
| qnrS      | R-ATCTGAACCACTGAACGTCGC<br>P-AAGTCGTGTTGGAAAAGTGTGAGCTGTGG<br>F-CGACGWGCTAACTTGCGTGA     | [22]       |
| mcr-1     | R-GGCATTGTTGGAACTTGCA<br>P-TCATTGAACAGGGTGATATCGAAGGCTGC<br>F-TGGCGTTCAGCAGTCATTAT       | [26]       |
| mcr-2     | R-AGCTTACCCACCGAGTAGAT<br>P-AGTTTCTTTCGCGTGCATAAGCCG<br>F-TTGTCGTGCTGTTATCCTATCG         | This study |
| mcr-3     | R-CCGTGCCATAAGTATCGGTAAA<br>P-ACTGATTATGGGTGCGGTGACGAG<br>F-CTTGCWGAACCAATCCCATTAC       | This study |
| mcr-4     | R-TTACCYCGAGCYGTTTCACC<br>P-TAAGCCCACGTTGATGTTYCTGGT<br>F-GCTGGCTTGGGTATCTAATGAC         | This study |
| mcr-5     | R-AAGTCCTAGCAAACGTGCGAAC<br>P--ACAGCGAGCAGAACAGGGCGGCTTT<br>F-GACTCTGTTCAATCAGCCTTGTC    | This study |
| mcr-9     | R-CCCAGTGCAAAGGAGCATTAG<br>P-TCACCCTGCTGTGCAATGGCGTGT<br>F-TGTTTATCACTGGCTCACTGGT        | This study |

|                   |                                    |            |
|-------------------|------------------------------------|------------|
|                   | R-GGATGGCAGGAAGGATACC              |            |
|                   | P-ACCGGTAAAGACGAACCATATAATAATTGAGC |            |
| sul1              | F-CCGTTGGCCTTCCTGTAAAG             | [22]       |
|                   | R-TTGCCGATCGCGTGAAGT               |            |
|                   | P-CAGCGAGCCTTGCGGCGG               |            |
| sul2              | F-CGGCTGCGCTTCGATT                 | [22]       |
|                   | R-CGCGCGCAGAAAGGATT                |            |
|                   | P-MGB-TGCTTCTGTCTGTTTCG            |            |
| sul3              | F-TAGGCTGCAAAGATAGGGAAAATG         | [22]       |
|                   | R-CAACGCCCACTTCAGTTGTATC           |            |
|                   | P-TGGAGCAGATGTGATTGATTGTTGGGAGC    |            |
| tetA              | F-TCTGAGCACTGTCGCGCTC              | [22]       |
|                   | R-ACAGGTGCGCAGGCAAA                |            |
|                   | P-TGGTTCACCTCGAACGACGTCACCG        |            |
| tetB              | F-TGTGGCAGGAAGAATAGCCAC            | [22]       |
|                   | R-ATCCCTGTAAAGCACCTTGCTG           |            |
|                   | P-TTGGCTGGTGGTGGGATCGCTT           |            |
| dfrA1             | F-TCGAAGAATGGAGTTATCGGGA           | [22]       |
|                   | R-TGTCAGATGTAAACTTGAACGTGTTA       |            |
|                   | P-TGGGAGCATTACCCAACCGAAAGTATGC     |            |
| dfrA12            | F-TGCTGCGATGGGAGCC                 | [22]       |
|                   | R-GACGGTTCGGTAGAGGCTTG             |            |
|                   | P-TTCGCAGACTCACTGAGGGAAAAGTCGT     |            |
| dfrA17            | F-GCGTAATCGGTAGTGGTCCCTGA          | [22]       |
|                   | R-TTCCGTTCTTTGACACTACTGCAT         |            |
|                   | P-TTGACTCTATGGGTGTTCTTCCAAATCGCA   |            |
| IncA/C            | F- GAACCAAAGACAAAGACCTGG           | This study |
|                   | R-TGCTCACGCTTTTGGTCCCAA            |            |
|                   | P-CTCGACGTWATCAAAGACTCACCGCAAATG   |            |
| IncFIA            | F-ATGGAYCTGTCATGGCGGAA             | This study |
|                   | R-AACGAACAGATACAGCAKACG            |            |
|                   | P-CGTAAAAATAGCCCCGGRATYGTCCAGT     |            |
| IncFIB-AP001918   | F-AACTGTTCCGGCGAGGTGGA             | This study |
|                   | R-CAGCTCTTCCGTGGCATCA              |            |
|                   | P-CACTGACACCAAACAATAACAACACCGTAC   |            |
| IncFIB-K          | F-ACTCGGTGTAATCCAGATAACC           | This study |
|                   | R-AGCGCAAGGAATCAGCCCA              |            |
|                   | P-ATCGCCTTACGCACCGTGTGGTTC         |            |
| IncFIB-pLF82pHCM2 | F-TGAACTCAAACAGCTGTCTCTG           | This study |
|                   | R-GTCCAGGCGYTTGCGTAAC              |            |
|                   | P-AGCCGAAGGGTACGARGACATAAGGATC     |            |
| IncFIB-pQIL       | F-TCGATGGAGACTGACTTCAAG            | This study |
|                   | R-CAGACCAGATACAACACCATTC           |            |
|                   | P-CTTCCATTACGCGAGTTTGCTACATTMTGC   |            |
| IncFIB-S          | F-CTCCGGTGAAATCGTAAATCTC           | This study |
|                   | R-GATCTCCACTTTATCAAACCCC           |            |
|                   | P-CTCTGATGCGGCTTGAGTATTTGTTCC      |            |
| IncFII            | F-GCACACCATCCTGCACTTAY             | This study |
|                   | R-CTATGCGGGGAGTATAGTYATG           |            |
|                   | P-CRCAGAAGGAGYGAGCACAGAAAGAAGTC    |            |
|                   | F-TAAGTGTTGGCTCGGTTGCATA           | This study |

|                           |                                                                                         |            |
|---------------------------|-----------------------------------------------------------------------------------------|------------|
| IncHI1A-<br>AF250878      | R-TGCTAGCGCCTCCTGAAATC<br>P-TCTACAAACATAAAACAAGCGAACTCGCTCA                             |            |
| IncHI1B-CIT-27            | F-GAAAACCGATCTCTTTAAGCTGG<br>R-TTCGAAGCTCAATACGCTGTAG<br>P-ACAGGCCCTGTAYCTGTATCTGGCTGA  | This study |
| IncFIA(HI1)               | F-TTGCCCTCAGGAAGCGTTG<br>R-CGCCTCAGTCAGCTCATTGTA<br>P-AGTCTGTCACACTTCACATGGACCTGTC      | This study |
| IncHI1B-MAR               | F-TCTTCCCGTCGACACGATAC<br>R-CACACCCATTTCCAGTTCATC<br>P-TCCGGATTTGGCCTGATAATGACCTCATC    | This study |
| IncHI2-1                  | F-ACCTTGCATCGGTAGTGCTTG<br>R-CGATACAGTTCCACATAGAAG<br>P-CTCGKAGTGGTCGGTTCACAGTAACG      | This study |
| IncHI2-2                  | F-CATGATGTGTACCTTACTGGCA<br>R-AACCGGAAGCCGTATTTCG<br>P-CATTGTCCTCCGAGTGTGCGTTCAGC       | This study |
| IncI2                     | F-GGCTTGAACATCGTTGATCGAT<br>R-CCTGGAAAASACGAGATTACG<br>R-AGGCAAGTTTTCCGCGATTGTAAATGCAG  | This study |
| IncI-I1                   | F-GGACGGCAGAATGCGCCAT<br>R-TGGGGGTTTTTCCTTTTATGGC<br>P-ATCTTCRGTCTTCTGACTTACTGYCCG      | This study |
| IncK/B/O/Z                | F-TGCGCCATAAGGCATTTCAGG<br>R-CACAAGCTGTCGCTTATGGC<br>P-CGGTTTCATATATACTTATCCCGTATTCTGTG | This study |
| IncLM-pOXA48-<br>AF550415 | F-AGCGCCAGGAACAGAAGAGT<br>R-GCGAACCCGCTTTTACATAGTA<br>P-CGGAGTTCCAGAGAGAGTACCGGA        | This study |
| IncL/M-pMU407             | F-CTGAAGAGTAAACTGACAGACG<br>R-CACCTGCCGCTCAACTACT<br>P-CACAAGCCCTCCGACTACAAACGACTA      | This study |
| IncN-1                    | F-TTTGAGTTAAGCCGTCTGCG<br>R-GGATCGTCCGTGGATTTCTGA<br>P-ATCGCGGAGCGAGTAGGTGGTGAAC        | This study |
| IncN-2                    | F-GTTTCTTCACCTTATGGGGATG<br>R-CAGCTGCAAACGACACGCG<br>P-CACAGGGAACCCGTCATAAAACGCTG       | This study |
| IncQ-1                    | F-GTGCCTGGAAGAACTCAGAG<br>R-AGGGCCAGCATGGATTACC<br>P-CTAACCACCAACTGCCTGCAAAGGAG         | This study |
| IncR                      | F-CCAGCCACGGACGTTTAAAC<br>R-TGTGGTTATGCCTCATGCAGG<br>P-CCGTTGATTGCGCCAGAGCATTTACC       | This study |
| IncX4-1                   | F-GACTTCCCTTTCTCGCTTAAC<br>R-TAGAGTTTATCTGGCACATGGC<br>P-TTTAGCAGCCATAGGCAATGTTGACAGCG  | This study |
| IS1294                    | F-GTCAACTGTCCGCTCAATAATG<br>R-CTTGCCAGACATCAGTAATGGA<br>P-CCGATAACACACCGGCAACAACAAGA    | This study |
| IS26-1                    | F-TGTTGCAAATAGTCGGTGGTG                                                                 | This study |

|             |                                    |            |
|-------------|------------------------------------|------------|
| IS26-2      | R-CATTCACTCCGCGTTCAGC              | This study |
|             | P-ATTCACTCCGCGTTCAGCCAGCATCT       |            |
|             | F-ATGGAGCTGCACATGAACCC             |            |
| IS903       | R-CTCACGGTAACTGATGCCG              | This study |
|             | P-TTTGCAGTACCAGCGTACGGCCAC         |            |
|             | F-TTCAGGCAATACGCACGCTTT            |            |
| IS903B      | R-ACAACAGATTACAACCGTCGC            | This study |
|             | P-TTCGTCATTTTGTTCAGCGCTCGTACCA     |            |
|             | F-GTTGCATCTGGCCGTTGAC              |            |
| IS4321-L    | R-CCGCAGTTCATCGTGACAGA             | This study |
|             | P-TGCAGACCTGTCGCTGAACAATGTGAC      |            |
|             | F-CCGGCGTCTGAATGGGATT              |            |
| IS4321-R    | R-AAGCTGGCCAGAATAGCCTG             | This study |
|             | P-CGCCTGATGAACCTCCAGAAAAATATACG    |            |
|             | F-TCTCAGCAGGCAATGCGNG              |            |
| IS6100      | R-CATCTTCGTCCAAC TTTCGTTTC         | This study |
|             | P-TGCATCGTGTCCGTGAATCCYTGGT        |            |
|             | F-TCAGAGGTAGGCTGTCGCT              |            |
| ISAb24      | R-AGGCCGATCACGGAAAGCT              | This study |
|             | P-CTGCGAAATGGTGGTTGAGCATGCC        |            |
|             | F-CCTCAATCCTTACCTGATGATG           |            |
| ISAb125     | R-GACTCGTCTTCAATCAGCTGT            | This study |
|             | P-CGGGTAAACCAGCAACTGTCGGAC         |            |
|             | F-TGGTCTCCTCAGCAAATAGCAA           |            |
| ISAp11      | R-TCTTGAAC TTTCGGCTGGGC            | This study |
|             | P-TCAACGATACGAGCATTACCCAAGGGTG     |            |
|             | F-GAGTACTTCTACCGACATCT             |            |
| ISCR1       | R-CTAGAGCGTGTCTGTTTCAGC            | This study |
|             | P-CGCGAGAAATGGTGTCTGGAGCTACGT      |            |
|             | F-AGTCAATCGCCCACTCAAACA            |            |
| ISCR3/14/27 | R-GATGACAATCCTCGCAGCG              | This study |
|             | P-CCTCACTCGAAGCCCAAGGTCAAC         |            |
|             | F-ATGGATGGGCTGCGGATGA              |            |
| ISEc33      | R-GCTTGTGGCTTTTCGTGTGCT            | This study |
|             | P-ATSACCTACCGCATCGCCACCGG          |            |
|             | F-ACGACGCCTGATGCAGAAAG             |            |
| ISEcp1-1    | R-AACGGATGAACGGGCACAACA            | This study |
|             | P-CCATGCTRATGCTTCATCGGGGTGAAC      |            |
|             | F-GTAGAAGGTCATCAAGAAGGTG           |            |
| ISEcp1-2    | R-GATCATTTCCGCAGCACCG              | This study |
|             | P-CTAAGAAACTGGGAAACCGATGCTACAATATC |            |
|             | F-TACCGGATTTGTAAGAAGTGGC           |            |
| ISSEn4      | R-ATCGTCTGATTTGATGTTAGCAAC         | This study |
|             | P-AATACTTACACTGCAAACGGTGCTGCGG     |            |
|             | F-GCATGAACGATATCGCTGAAC            |            |
| Tn2         | R-CATGGTGTGAGTTGCGCTTA             | This study |
|             | P-CCAGTGCTCATTCAAACATTCATCGCGAA    |            |
|             | F-AGATCAGTTGGGTGCACGAG             |            |
| ISKpn14     | R-TTCTGAGAATAGTGTATGCGGC           | This study |
|             | P-ACAGCGGTAAGATCCTTGAGAGTTTTTCGC   |            |
|             | F-GTGGCTTCAGTCTCCGTCT              |            |

|         |                                                                                                                         |                    |
|---------|-------------------------------------------------------------------------------------------------------------------------|--------------------|
| ISKpn26 | R-GAGAAGCGGCATAAGTGAAGG<br>P-CTGTCCCTCCTGTTCCGCTACTGAA<br>F-GAATTTCCGCCACCTGCTC<br>R-CCACTGATTGCCTTTCTTGGT              | This study         |
| ISKpn19 | P-TGTTCAAGACCATCAATCGCTGGCTGG<br>F-ATACTCAACACCATATCCGGTG<br>R-GAGTCGTCATTTTCATAGGAGATC<br>P-CTGTTTGGCGTTATTCCGGTATCCGG | This study         |
| ISKpn27 | F-GGAAATCAGGAACTCGACGCT<br>R-GGCTGGATTGATGAACTCGC<br>P-ACGTCACCCGCCAAACCATCCGAAA                                        | This study         |
| intI1   | F-GCCTTGATGTTACCCGAGAG<br>R-GATCGGTCTGAATGCGTGT<br>P-CGACGCCCTTGAGCGGAAGTATC                                            | Modified from [27] |
| intI2   | F-GACGGCTACCCTCTGTTATCTC<br>R-TGCACCATAACAGCAGCGTA<br>P-TGCGAGTATCCATAACCTGCAAAATGCGTT                                  | Modified from [27] |
| intI3   | F-GCCACCACTTGTGTTGAGGA<br>R-GGATGTCTGTGCCTGCTTG<br>P-TGCAGCAAGTGGGTGGCGAATGAGT                                          | Modified from [27] |

#### References:

22. Rochegüe, T.; Haenni, M.; Cazeau, G.; Metayer, V.; Madec, J.Y.; Ferry, T.; Lupo, A. An inventory of 44 qPCR assays using hydrolysis probes operating with a unique amplification condition for the detection and quantification of antibiotic resistance genes. *Diagn. Microbiol. Infect. Dis.* **2021**, *100*, 115328. <https://doi.org/10.1016/j.diagmicrobio.2021.115328>.
23. Quirós, P.; Colomer-Lluch, M.; Martínez-Castillo, A.; Miró, E.; Argente, M.; Jofre, J. Antibiotic-resistance genes in the bacteriophage DNA fraction of human fecal samples. *Appl. Environ. Microbiol.* **2014**, *58*, 606–609. <https://doi.org/10.1128/AAC.01684-13>.
24. Toner, G.; Russell, C.D.; Hamilton, F.; Templeton, K.; Laurenson, I.F. Phenotypic and molecular detection methods for carbapenemase-producing organisms and their clinical significance at two Scottish tertiary care hospitals. *J. Med. Microbiol.* **2019**, *68*, 560–565. <https://doi.org/10.1099/jmm.0.000931>.
25. Colomer-Lluch, M.; Jofre, J.; Muniesa, M. Quinolone resistance genes (*qnrA* and *qnrS*) in bacteriophage particles from wastewater samples and the effect of inducing agents on packaged antibiotic resistance genes. *J. Antimicrob. Chemother.* **2014**, *69*, 1265–1274. <https://doi.org/10.1093/jac/dkt528>.
26. Irrgang, A.; Roschanski, N.; Tenhagen, B.A.; Grobbel, M.; Skladnikiewicz-Ziemer, T.; Thomas, K.; Roesler, U.; Käsbohrer, A. Prevalence of *mcr-1* in *E. coli* from livestock and food in Germany, 2010–2015. *PLoS ONE* **2016**, *11*, e0159863. <https://doi.org/10.1371/journal.pone.0159863>.
27. Muziasari, W.I.; Pärnänen, K.; Johnson, T.A.; Lyra, C.; Karkman, A.; Stedtfeld, R.D.; Tamminen, M.; Tiedje, J.M.; Virta, M. Aquaculture changes the profile of antibiotic resistance and mobile genetic element associated genes in Baltic Sea sediments. *FEMS Microbiol. Ecol.* **2016**, *92*, fiw052. <https://doi.org/10.1093/femsec/fiw052>.
