# Supplementary material for: High Throughput Screening of Antimicrobial Resistance Genes in Gram-Negative Seafood Bacteria
Source: MDPI journal article supplement (doi:10.3390/microorganisms10061225), 2022-06-15
Supplement: s1 [file s1]

**Table S2.** Controls used to validate the assays.

| List of whole genome sequenced strains | List of strains used as positive controls for specific genes (genes)                                                                   | List of plasmids used as positive controls for specific genes (target) |
|----------------------------------------|----------------------------------------------------------------------------------------------------------------------------------------|------------------------------------------------------------------------|
| 19383                                  | 15F1211 ( <i>mcr-3</i> )                                                                                                               | pCMY-3 ( <i>bla<sub>CMY-3</sub></i> )                                  |
| 26307                                  | E. coli 30 Holland ( <i>bla<sub>TEM-1B</sub></i> )                                                                                     | pFIBpQIL ( <i>IncFIB</i> )                                             |
| 27838                                  | E. coli 24 Holland ( <i>bla<sub>TEM-1F</sub></i> )                                                                                     | pFIB-pLF82pHCM2 ( <i>IncFIB</i> )                                      |
| 30457                                  | S. Virchow 58.67 Holland ( <i>bla<sub>TEM-1b</sub></i> , <i>bla<sub>CTX-M-2</sub></i> , <i>bla<sub>SHV</sub></i> )                     | pIncHI1B-Mar ( <i>IncHI1B</i> )                                        |
| 33777                                  | TZ116 ( <i>bla<sub>VIM-1</sub></i> , <i>bla<sub>CMY-13</sub></i> )                                                                     | pIncN-2 ( <i>IncN-2</i> )                                              |
| 34511                                  | S. concordiae05-5343 ( <i>bla<sub>CTX-M-15</sub></i> , <i>qnrA</i> )                                                                   | pISAb24 ( <i>ISAb24</i> )                                              |
| 34978                                  | 59-45 Holland ( <i>bla<sub>CTX-M-3</sub></i> )                                                                                         | pISEc33 ( <i>ISEc33</i> )                                              |
| 36493                                  | 15Q004074 ( <i>mcr-4</i> )                                                                                                             | pISKpn26 ( <i>ISKpn26</i> )                                            |
| 37007                                  | 09CEB904SAL ( <i>bla<sub>CMY-2</sub></i> , <i>intI1</i> , <i>bla<sub>TEM</sub></i> , <i>armA</i> , <i>bla<sub>CTX-M-1group</sub></i> ) | pISKpn14 ( <i>ISKpn14</i> )                                            |
| 38947                                  | Virchow Vagtel 7522438-1 ( <i>bla<sub>CTX-M-9</sub></i> )                                                                              | pISKpn19 ( <i>ISKpn19</i> )                                            |
| 41711                                  | PYO pERO ( <i>bla<sub>PER-1</sub></i> )                                                                                                | pISKpn27 ( <i>ISKpn27</i> )                                            |
| 41726                                  | S. Newport 03-3225 (08CEB3400SAL) ( <i>bla<sub>CMY</sub></i> , <i>IncA/C2</i> )                                                        | pintI3 ( <i>intI3</i> )                                                |
| 44091                                  | 04CEB8118SAL ( <i>bla<sub>CTX-M-53</sub></i> )                                                                                         | pHI1A ( <i>IncHI1A</i> )                                               |
| 46558                                  | DAK2 ( <i>bla<sub>SHV-12</sub></i> )                                                                                                   | pIncFIB-Mar ( <i>IncFIB</i> )                                          |
| 46814                                  | Kp37 ( <i>mcr-2</i> )                                                                                                                  | pFIBS ( <i>IncFIB</i> )                                                |
| 46839                                  | RD29 ( <i>mphA</i> , <i>bla<sub>TEM</sub></i> , <i>bla<sub>KPC</sub></i> )                                                             |                                                                        |
| 46877                                  | 15F2357 ( <i>mcr-3</i> )                                                                                                               |                                                                        |
| 46886                                  | KPC-2 ( <i>bla<sub>KPC-2</sub></i> )                                                                                                   |                                                                        |
| 46969                                  | Transkonj ( <i>bla<sub>CMY-1</sub></i> )                                                                                               |                                                                        |
| 47107                                  | DH10B MSC234 ( <i>bla<sub>OXA-48</sub></i> )                                                                                           |                                                                        |
| 47303                                  | CTX-M-8 (GIS) ( <i>bla<sub>CTX-M-8</sub></i> )                                                                                         |                                                                        |
| 47323                                  | E11 ( <i>bla<sub>CTX-M-8</sub></i> )                                                                                                   |                                                                        |
| 47384                                  | E68 ( <i>bla<sub>CTX-M-8</sub></i> )                                                                                                   |                                                                        |
| 10CEB2598SAL                           | pMUR050 ( <i>aadA2</i> , <i>armA</i> , <i>aph(3')-Ia</i> , <i>sul1</i> , <i>intI1</i> )                                                |                                                                        |
| 10CEB2956SAL                           |                                                                                                                                        |                                                                        |

|                                                                                                                                                                                                                                                                                                                                                               |  |  |
|---------------------------------------------------------------------------------------------------------------------------------------------------------------------------------------------------------------------------------------------------------------------------------------------------------------------------------------------------------------|--|--|
| 10CEB8748SAL<br>12CEB117SAL<br>12CEB2196SAL<br>12CEB3121SAL<br>12CEB432SAL<br>12CEB4337SAL<br>12CEB4367SAL<br>12CEB707SAL<br>1697-O26<br>16-B3PA-006<br>1746-O26<br>1886-O26<br>2D7<br>2K7<br>3383-O103<br>382-O145<br>97HMPL915<br>BEN2200<br>CB12450<br>CB12669<br>CB13483<br>CB13938<br>CB15046<br>CHI-004<br>E5<br>G8<br>L168<br>NV34<br>RDP19<br>RSA-005 |  |  |
|---------------------------------------------------------------------------------------------------------------------------------------------------------------------------------------------------------------------------------------------------------------------------------------------------------------------------------------------------------------|--|--|

|                  |  |  |
|------------------|--|--|
| S12LNR3592<br>Z7 |  |  |
|------------------|--|--|
